1 **Mycorrhizal status impacts the genetic architecture of mineral accumulation in field**  
2 **grown maize (*Zea mays* ssp. *mays* L.)**

3 Meng Li<sup>1†</sup>, Sergio Perez-Limón<sup>1†</sup>, M. Rosario Ramírez-Flores<sup>2,3†</sup>, Benjamín Barrales-  
4 Gamez<sup>2,4</sup>, Marco Antonio Meraz-Mercado<sup>2</sup>, Gregory Ziegler<sup>5</sup>, Ivan Baxter<sup>5</sup>, Víctor Olalde-  
5 Portugal<sup>2</sup> and Ruairidh J. H. Sawers<sup>1\*</sup>

6 <sup>1</sup> Department of Plant Science, The Pennsylvania State University, State College, PA, 16802,  
7 USA.

8 <sup>2</sup> Departamento de Biotecnología y Bioquímica, Centro de Investigación y de Estudios  
9 Avanzados (CINVESTAV-IPN), Irapuato, Guanajuato, 36821, México.

10 <sup>3</sup> Bioscience Division, Oak Ridge National Laboratory, 1 Bethel Valley Rd, Oak Ridge, TN  
11 37830, USA.

12 <sup>4</sup> Postgrado en Recursos Genéticos y Productividad-Genética, Campus Montecillo, Colegio  
13 de Postgraduados, Montecillo, Texcoco, Edo. de México, 56230, México.

14 <sup>5</sup> Donald Danforth Plant Science Center, St. Louis, Missouri, 63132, USA.

15 †These authors contributed equally to this work.

16 \*Corresponding author: Ruairidh J. H. Sawers (rjs6686@psu.edu)

17 ORCID:

18 Meng Li (0000-0002-6411-3085)

19 Sergio Perez-Limón (0000-0002-1893-4325)

20 M. Rosario Ramírez-Flores (0000-0003-2561-0086)

21 Benjamín Barrales-Gamez (0000-0002-5264-7637)

22 Marco Antonio Meraz-Mercado (0000-0002-7742-5379)

23 Gregory Ziegler (0000-0001-6455-7148)

24 Ivan Baxter (0000-0001-6680-1722)

25 Víctor Olalde-Portugal (0000-0002-0795-6035)

26 Ruairidh J. H. Sawers (0000-0002-8945-3078)

27

28 **SUMMARY**

29 Arbuscular mycorrhizal fungi (AMF) establish symbioses with major crop species, providing  
30 their hosts with greater access to mineral nutrients and promoting tolerance to heavy metal

31 toxicity. There is considerable interest in AMF as biofertilizers and for their potential in  
32 breeding for greater nutrient efficiency and stress tolerance. However, it remains a challenge  
33 to estimate the nutritional benefits of AMF in the field, in part due to a lack of suitable AMF-  
34 free controls. Here we evaluated the impact of AMF on the concentration of 20 elements in  
35 the leaves and grain of field grown maize using a custom genetic mapping population in  
36 which half of the families carry the AMF-incompatibility mutation *castor*. By comparing  
37 AMF-compatible and AMF-incompatible families, we confirmed the benefits of AMF in  
38 increasing the concentration of essential mineral nutrients (*e.g.*, P, Zn, and Cu) and reducing  
39 the concentration of toxic elements (*e.g.*, Cd and As) in a medium-input subtropical field. We  
40 characterised the genetic architecture of element concentration using quantitative trait  
41 mapping and identified loci that were specific to AMF-compatible or AMF-incompatible  
42 families, consistent with their respective involvement in mycorrhizal or direct nutrient  
43 uptake. Patterns of element covariance changed depending on AMF status and could be used  
44 to predict variation in mycorrhizal colonisation. We comment on the potential of AMF to  
45 drive genotype-specific differences in the host ionome across fields and to impact the  
46 alignment of biofortification breeding targets. Our results highlight the benefits of AMF in  
47 improving plant access to micronutrients while protecting from heavy metals, and indicate  
48 the potential benefits of considering AMF in biofortification programs.

49 **Key words:** arbuscular mycorrhizal fungi (AMF), AMF incompatible mutation, ionome,  
50 maize, quantitative trait loci mapping, colonisation, biofortification

51

## 52 INTRODUCTION

53 Arbuscular mycorrhizal fungi (AMF) are a widely distributed group of soil fungi that form  
54 mutualistic associations with more than 80% of terrestrial plant species including the major  
55 staple crops (Wang & Qiu, 2006). One of the major benefits of AMF to hosts is enhanced  
56 phosphorus (P) acquisition through an extensive root-external hyphal network that accounts  
57 for up to 90% of the total P uptake (van der Heijden *et al.*, 2015). Arbuscular mycorrhizal  
58 (AM) symbioses also play important roles in promoting the uptake of other macro- and  
59 micronutrients such as N, S, Zn, and Cu, and mitigating the toxicity of heavy metals, such as  
60 Cd, As, and Pb (Lehmann & Rillig, 2015; Ruytinx *et al.*, 2020). Previous studies have  
61 reported that the nutritional benefits of AMF extend to the edible tissues of various crops  
62 (Pellegrino & Bedini, 2014; Pepe *et al.*, 2022; Gupta *et al.*, 2022), suggesting the potential for

63 enhanced food quality and biofortification. Given the nutritional benefits provided by AMF,  
64 there is a growing interest in breeding for more AMF-effective crops as a contribution to  
65 enhanced plant nutrient use efficiency (Cobb *et al.*, 2021; Thirkell *et al.*, 2022). However,  
66 although AM symbioses have been shown to be beneficial in many greenhouse studies, there  
67 is a lack of support at the field scale due to environmental heterogeneity and the lack of non-  
68 mycorrhizal controls (Ryan & Graham, 2018). In addition, the low heritability of AMF  
69 colonisation and its inconsistent relationship with plant growth and nutrient content suggest  
70 the need to search for more reliable breeding targets for AM fungal benefits (Leiser *et al.*,  
71 2016; Feldmann, 2009).

72         Field evaluation of the nutritional benefits of AM symbioses is challenging, as it is  
73 difficult to manipulate AM communities without changing other variables. Field inoculation  
74 can be complicated by the presence of native fungal communities and is not cost-effective at  
75 a large scale in many cropping systems (Ortas, 2012; Salomon *et al.*, 2022). Applying  
76 fungicides to experimentally reduce the abundance of native AMF has limited effect and may  
77 impact non-target fungal species, disrupting other biotic interactions and complicating the  
78 interpretation of the results (Buysens *et al.*, 2015). Other strategies using agricultural  
79 management practices to manipulate AM fungal communities, such as plant rotation with  
80 non-host species or tillage, are confounded by other factors, such as soil water and nutrient  
81 availability (Ryan & Graham, 2018). As a result, reported estimates of host nutritional  
82 responses to AMF at the field scale vary widely (Lehmann *et al.*, 2014; Lehmann & Rillig,  
83 2015). Comparing AMF-incompatible mutant plants to their AMF-compatible wild-type  
84 siblings is an attractive complementary strategy to evaluate the impact of the AM symbiosis  
85 under field conditions (Watts-Williams & Cavagnaro, 2015; Bowles *et al.*, 2016; Ryan &  
86 Graham, 2018; Ramírez-Flores *et al.*, 2020).

87         Traditionally, studies of plant nutrition focused on different elements in isolation.  
88 However, the accumulation of nutrients in plants is strongly influenced by the interactions  
89 among elements, through soil chemistry, physiological disruption caused deficiency or  
90 toxicity, and crosstalk among plant nutrient signalling pathways (Baxter, 2015). Profiling the  
91 ionome, the complete set of mineral nutrients and trace elements in an organism (Lahner *et*  
92 *al.*, 2003), provides an opportunity to comprehensively understand element accumulation and  
93 patterns of interaction. AMF can improve the content of some nutrient elements, such as P,  
94 by direct transportation through fungal networks (Chiu & Paszkowski, 2019). AMF can also

95 impact host nutrient status indirectly by altering root architecture or as a consequence of  
96 alleviating primary deficiencies (Ramírez-Flores *et al.*, 2019). Indeed, the concentration of a  
97 number of elements can be significantly changed in response to AMF inoculation (Hart &  
98 Forsythe, 2012; Ramírez-Flores *et al.*, 2017). It is possible that the acquisition, translocation,  
99 and homeostasis of one element may be affected by the capacity of plants to acquire other  
100 nutrients directly or indirectly through AMF. The interplay between elements and AMF can  
101 be further complicated by soil nutrient availability. As reviewed in a meta-analysis, AMF  
102 increased tissue Cu, Mn, Fe and S levels under P deficiency, but not when P was sufficient  
103 (Watts-Williams & Cavagnaro, 2014). Given the impact of complex interactions among  
104 elements and AM symbiosis, it is informative to consider the ionome as a whole to fully  
105 understand the nutritional benefits of AM symbiosis under field conditions.

106 Plant roots can take up nutrients directly from the soil (the *direct* pathway) or acquire  
107 them via symbiosis with AMF (the *AMF* pathway; (Smith *et al.*, 2003)). In the case of P,  
108 specific members of the PHT1 phosphate transporter family have been identified to be  
109 involved in the direct and AMF pathways, their expression and accumulation patterns  
110 responding to colonisation by AMF (Bucher, 2007; Chiu & Paszkowski, 2019; Salvioli di  
111 Fossalunga & Novero, 2019). For example, MtPT4, OsPT11 and ZmPT6 accumulate  
112 predominantly in the periarbuscular membrane surrounding arbuscules in *Medicago*  
113 *truncatula*, rice and maize, respectively (Harrison *et al.*, 2002; Sawers *et al.*, 2017;  
114 Paszkowski *et al.*, 2002; Willmann *et al.*, 2013; Fabiańska *et al.*, 2020). Conversely,  
115 transporters implicated in direct P uptake are repressed in response to AMF (Bucher, 2007;  
116 De Vita *et al.*, 2018). Although currently less well defined, analogous direct and AMF  
117 pathways appear to also function in N uptake, driven by specific accumulation of distinct  
118 ammonium transporters (Hui *et al.*, 2022; Koegel *et al.*, 2013). Further transporter families  
119 (for example, the ZIP Zn transporters (Nguyen *et al.*, 2019); or SULTR sulphate transporters  
120 (Casieri *et al.*, 2012)) have been reported to show gene-specific patterns of induction or  
121 repression during AM symbiosis, suggesting the concept of direct and AMF uptake to extend  
122 across the ionome, with the potential for AMF to influence crosstalk during nutrient  
123 homeostasis (Xie *et al.*, 2019). The accumulation of nutrient transporter genes involved in  
124 direct and AMF pathway can vary among plant genotypes, *e.g.*, phosphate transporter genes  
125 in maize (Sawers *et al.*, 2017), indicating that host genetic factors may have a large impact on  
126 mycorrhizal-mediated nutrient uptake of plants.

127 Here we evaluated the ionome of a bi-parental maize genetic mapping population in  
128 which half the families carry the mutation *castor* and are incompatible with AMF. By  
129 comparing AMF-compatible and AMF-incompatible families, we estimated the importance  
130 of AMF on the accumulation of 20 elements in the field. We characterised the genetic  
131 architecture of host element accumulation in response to AMF and identified genetic regions  
132 associated with element concentration variation in AMF-compatible and incompatible  
133 families. Furthermore, we tested the capacity of ionome profiles to predict mycorrhizal status  
134 and assessed the potential of breeding AMF-effective hosts to achieve biofortification targets.

135

## 136 **RESULTS**

### 137 **The *castor* mutation impacted the leaf and grain ionome of field grown plants**

138 To assess the impact of AM symbioses on host mineral element accumulation in the field, we  
139 used inductively coupled plasma mass spectrometry (ICP-MS) to evaluate the concentrations  
140 of 20 elements in leaf and grain samples from a previously described custom mapping  
141 population (see Materials and Methods and (Ramírez-Flores *et al.*, 2020)) grown in a  
142 subtropical, medium input, field in central-western Mexico. The population was generated  
143 from the cross between W22 (temperate) and CML312 (subtropical) maize inbred lines and  
144 contained both AMF-compatible (AMF-C; 75 families) and AMF-incompatible (AMF-I; 66  
145 families) families to allow estimation of the overall impact of AMF and the characterization  
146 of genetic architecture underlying ionome differences among the families. Among the 20  
147 tested elements, 17 in leaves and 9 in grain differed significantly in concentration between  
148 AMF-C and AMF-I families, including both essential mineral nutrients and toxic heavy  
149 metals (Fig. 1; Table 1). Element response to AMF (*Mycorrhizal Response* - MR; defined  
150 here as the percentage increase in AMF-C compared with AMF-I) ranged from -36% to  
151 116% in leaves and from -25% to 65% in grain (Fig. 1A). Zn and Cu concentrations showed  
152 the highest positive response in both leaves (116% and 71%, respectively) and grain (50%  
153 and 65%, respectively). The concentrations of potential toxic elements, such as As (-36%)  
154 and Mn (-24%) in leaves, and As (-20%) and Cd (-23%) in the grain, were significantly  
155 reduced in AMF-C plants, consistent with previous reports (Lehmann & Rillig, 2015;  
156 Ruytinx *et al.*, 2020). We conducted Principal Component (PC) analyses, and AMF-C and  
157 AMF-I ionomes were separated by the first PCs in both leaf and grain, which captures AM  
158 effect driven by Zn, Cu, and Fe (Supplementary Fig. S1). Although not the most responsive

159 element, leaf P concentration was significantly increased in AMF-C compared to AMF-I  
160 families (8.5%). Grain P concentration did not change significantly with AMF status. In our  
161 study field, both AMF-C and AMF-I families maintained an average P concentration within a  
162 typical critical range (Gagnon *et al.*, 2020), indicating that P limitation was not a major driver  
163 of previously reported differences in plant performance (Ramírez-Flores *et al.*, 2020).

164 In addition to impacting individual elements, AM status affected patterns of  
165 covariance among elements. AMF-C and AMF-I families were more clearly distinguished by  
166 leaves than grain as shown by the magnitude of MR associated with individual elements (Fig.  
167 1A). This pattern was supported by significant differences between pairwise correlation  
168 matrices for element concentrations in the leaves of AMF-C and AMF-I families ( $p < 0.001$ ;  
169 Fig. 1B). For AMF-C and AMF-I leaves (Fig. 1B), 11 of the significant correlations were  
170 independent of AM status (*e.g.*, the positive correlations between Sr and Ca, or As and Fe). In  
171 contrast, the sign of three correlations changed with AM status, indicating a strong effect of  
172 AMF on covariance (*e.g.*, the positive correlation between Zn and the three elements Sr, Ca  
173 and Mn in AMF-C became negative in AMF-I). Ten significant correlations were specific to  
174 AMF-C (*e.g.*, the positive correlations between K and P) and 10 to AMF-I (*e.g.*, the positive  
175 correlation of P and Cu) families. The grain element correlation matrix, unlike that of leaves,  
176 was not significantly different between AMF-C and AMF-I families ( $p = 0.0596$ ; Fig. 1B),  
177 although only five pairwise correlations were shared across AM status of a total of 11 and 14  
178 significant correlations in AMF-C and AMF-I families, respectively (Fig. 1B). We also  
179 conducted Factor Analysis to reduce the dimension of element accumulation patterns and  
180 extracted the latent variables that share common trends in differentiating AMF-C and AMF-I  
181 for downstream analyses (Supplementary Fig. S2). In summary, AM status substantially  
182 affected patterns of covariance among elements, with more than half of the significant  
183 correlations changing depending on AMF status in leaf and grain.

184

### 185 **The genetic architecture of element accumulation was impacted by AMF status**

186 Having observed a significant general effect of AMF status on the plant ionome, we  
187 proceeded to use Quantitative Trait Loci (QTL) linkage mapping to evaluate genetic  
188 differences between W22 and CML312 hosts and AMF  $\times$  QTL effects. As discussed  
189 previously, we equated AMF-C and AMF-I specific QTL with mycorrhizal *benefit* and  
190 *dependence*, respectively (Ramírez-Flores *et al.*, 2020; Sawers *et al.*, 2010). In the context of  
191 the ionome, AMF  $\times$  QTL effects may also reflect a distinction between AMF and direct plant

192 uptake pathways (Smith *et al.*, 2003). To identify AMF  $\times$  QTL effects, we ran a series of  
193 QTL models: 1) all families without taking AMF status into account; 2) all families with  
194 AMF status as an additive covariate; 3) all families with AMF status as an interactive  
195 covariate; 4) AMF-I families alone; 5) AMF-C families alone. Model 2 eliminates the main  
196 effect of AMF status, but does not allow for the effect of W22 and CML312 alleles to differ  
197 with AMF status (*i.e.*, AMF  $\times$  QTL effects are not modelled). AMF  $\times$  QTL effects are  
198 captured explicitly by model 3, and by comparing the results of models 4 and 5. We  
199 considered leaf and grain element concentrations as separate traits in our analysis.

200         Across all models, we detected a total of 33 element QTL, considering QTL for the  
201 same element detected in the same genetic bin in different models as the same. When QTL  
202 for different elements colocalized to the same bin, we report them as distinct loci, although it  
203 is likely they represent a single pleiotropic genetic variant. Similarly, we report QTL detected  
204 for leaf and grain data as distinct. QTL were annotated by element, chromosome, genetic bin,  
205 and tissue (Fig. 2). Thirteen QTL were detected in the grain and 20 in the leaves. In a single  
206 instance (qCd 2.05), a QTL for the same element is co-localised in leaf and grain, presumably  
207 representing a single causal locus. Fifteen QTL were detected specifically in AMF-C families  
208 but not AMF-I families, and, conversely, 5 QTL were detected in AMF-I but not AMF-C  
209 families. Six of these AMF status specific QTL were further supported as examples of AMF  
210  $\times$  QTL interaction by Model 3. A further QTL (qAs<sub>gr</sub>8.09) was identified uniquely by Model  
211 3. The AMF  $\times$  QTL effects we detected were all *conditional* in nature (*i.e.*, specific to AMF-  
212 C or AMF-I families). We did not find evidence of any QTL showing strong, but opposing,  
213 allelic effects between AMF-C and AMF-I families (*antagonistic pleiotropy*. See *e.g.*,  
214 (Ramírez-Flores *et al.*, 2020)). For the AMF-C specific QTL qCd<sub>lf/gr</sub>2.05 and qNi<sub>gr</sub>9.01, the  
215 effect was sufficiently strong that they were supported by Models 1 and 2, but not Model 3  
216 (*i.e.*, the interactive model did not present marked improvement over the additive model).  
217 Globally, the parental allelic effect of detected QTLs varies depending on the element and  
218 tissue type (Fig. 2). For example, for QTLs detected in bin 4.08 for leaf in AMF-C families,  
219 the genotypes that carry the CML312 allele tend to accumulate less Ca, Fe and As, but more  
220 Rb. For qCd<sub>lf/gr</sub>2.05, the allelic effect is conserved across grain and leaf in the AMF-C  
221 families, where the genotypes with W22 allele tend to accumulate less Cd than genotypes  
222 with the CML312 allele. In contrast, for qNi<sub>gr</sub>9.01, the AMF-C with the W22 allele at this  
223 QTL tends to accumulate Ni in the grain.

224

225 **Loci with AMF  $\times$  QTL effects co-localized with QTL showing G $\times$ E in a previous**  
226 **multisite ionome experiment**

227 To obtain more rigorous support for our QTL and assess the potential for AMF to impact  
228 ionome variation across environments, we compared our findings to a published maize  
229 multisite ionome dataset (Asaro *et al.*, 2016). This previous work presented grain ionome  
230 data for a biparental maize mapping population (hereafter, the IBM data), evaluated during  
231 the period of 2005 to 2012, in five different US states, although without specific  
232 characterization of the soil microbial community. We re-analysed these data to facilitate  
233 comparison with our results and considered each location separately to investigate overlap  
234 between AMF  $\times$  QTL effects in our work and G  $\times$  E effects in the published study. In  
235 addition to QTL identified for individual elements in the previous section, we also included  
236 QTL identified for element interaction patterns, including element ratios and the first five  
237 latent variables of Factor Analysis, for comparison. We obtained support for 12 of our QTL  
238 from the previous data through common signals associated with the same elements in shared  
239 genomic bins (Fig. 3A). Interestingly, 10 of the QTL supported by the IBM grain data were  
240 identified by us in leaves. The greater power and resolution of the IBM data set increased  
241 confidence in our QTL and allowed a more precise estimation of our genomic location  
242 (Supplementary Table S1). Nine of the overlapping QTL were detected preferentially in  
243 AMF-C plants in our experiments, suggesting AMF communities to be active in the IBM  
244 field sites (Fig. 3B). These common QTL also showed evidence of G  $\times$  E interaction in the  
245 previous study (Fig. 3B). Although difficult to substantiate without further data, we speculate  
246 that variation in the AMF community between field sites contributed to G  $\times$  E effects seen in  
247 the IBM. For example, strongly supported AMF-C conditional QTL linked to Cd and Ni on  
248 chromosomes 2 and 9, respectively, were clearly recovered in IBM data from North Carolina  
249 and New York but not detected at all in Missouri (Fig. 3B). Absolute element concentrations  
250 indicate that these elements were present in the Missouri environment, although no QTL were  
251 detected. Furthermore, the Missouri location lacked signal for an AMF conditional Fe QTL  
252 on chromosome 4 that was mildly supported by the other sites, instead showing strong  
253 location-specific signals on other chromosomes.

254

255 **Patterns in the ionome were correlated with the extent of arbuscular mycorrhizal**  
256 **colonisation**

257 Having observed clear differences between AMF-C and AMF-I families, we proceeded to  
258 assess whether ionome variation *within* the AMF-C family was a reflection of differences in



259 the extent of mycorrhizal colonisation. We used microscopy to quantify mycorrhizal hyphae,  
260 arbuscules and vesicles from field sampled AMF-C roots in terms of percent root length  
261 colonised (as reported previously, AMF-I families were free from root-internal fungal  
262 structures (Ramírez-Flores *et al.*, 2020)). We observed appreciable colonisation in field  
263 sampled roots (hyphae = 23.6%  $\pm$  2%, arbuscules = 16%  $\pm$  1.4%, and vesicle = 3.4%  $\pm$   
264 0.4%), with individual families ranging from 0 to 74.4% in hyphae colonisation (Fig. 4A). To  
265 investigate the relationship between the extent of colonisation and the ionome, we used the  
266 Boruta feature-reduction method to identify correlations between individual elements and  
267 fungal structures. Leaf and grain element concentrations were included simultaneously in a  
268 single analysis. The most informative elements were leaf Fe for hyphae, and leaf Fe and Rb  
269 for arbuscules (Fig. 4B; Supplementary Fig. S3). Informative elements were used to build  
270 Random Forest (RF) models. The trained RF models were used to predict the colonisation  
271 phenotypes in the training and whole dataset, and the performance of the models was  
272 assessed by estimating the testing ( $R^2_T$ ) and whole dataset ( $R^2_{WD}$ ) metrics between the  
273 observed and predicted data (Fig. 4C; Supplementary Fig. S3, S4). The best performing  
274 model was for hyphae ( $R^2_T = 0.11$ ,  $p_T = 0.17$ ;  $R^2_{WD} = 0.29$ ,  $p_{WD} < 0.001$ ), followed by  
275 arbuscules ( $R^2_T = 0.03$ ,  $p_T = 0.49$ ;  $R^2_{WD} = 0.44$ ,  $p_{WD} < 0.001$ ), and vesicles ( $R^2_T = 0.041$ ,  $p_T =$   
276  $0.49$ ;  $R^2_{WD} = 0.21$ ;  $p_{WD} < 0.001$ ).

277 Our models indicated a relationship between the abundance of fungal structures and  
278 the ionome, suggesting that, for a specific environment, a locally trained model could  
279 estimate colonisation from element quantification without the need to directly examine roots.  
280 We reasoned that ionome predicted values based on a field-wide model might be less biased  
281 at the level of the individual than direct observation, given the difficulties of estimation when  
282 sampling from a large, heterogeneously colonised root system (Montero *et al.*, 2019). To  
283 explore this idea, we compared the results of QTL mapping using observed or predicted  
284 values of colonisation. Using directly observed values we did not detect any significant QTL  
285 ( $\alpha = 0.1$ ), which was not too surprising given the small size of our mapping population and  
286 the difficulty of estimating the trait values. Using predicted values, however, we could detect  
287 QTL linked to abundance of arbuscules (Chr 4. Fig 4D) and hyphae (Chr 4. Supplementary  
288 dataset). The arbuscule QTL qArb4.08 co-localized with QTL for leaf Rb and Fe  
289 concentration - the two ions contributing to the predictive model. The CML312 allele at  
290 qArb4.08 was associated with relatively high levels of leaf Rb, low levels of leaf Fe, and  
291 fewer arbuscules; conversely, the W22 allele at qArb4.08 was associated with relatively low  
292 levels of Rb, high levels of Fe and greater arbuscule abundance (Fig. 4E). The effects of

293 qFe<sub>1r</sub>4.08 and qRb<sub>1r</sub>4.08 QTL were conditional on AM symbiosis and no significant  
294 differences were seen between alleles in AMF-I families (Fig. 4E). The conditionality of  
295 qFe<sub>1r</sub>4.08 and qRb<sub>1r</sub>4.08 is consistent with their capturing an aspect of mycorrhizal function  
296 also reflected in arbuscule abundance. We compared direct observation and predicted values  
297 of colonisation in their relationship to plant phenological traits and yield components.  
298 Consistent with previous reports (*e.g.*, (Sawers *et al.*, 2017)), we did not find any simple  
299 correlation between the abundance of root internal fungal structures and yield components.  
300 We did observe greater arbuscule abundance to be correlated with accelerated flowering (Fig.  
301 4F). Similar to the QTL analysis, this correlation was more significant with the predicted  
302 arbuscule values than the direct observations.

303

### 304 **Mycorrhizal colonisation promoted alignment of biofortification breeding targets**

305 To understand the potential impact of AMF on host evolvability towards biofortification  
306 breeding targets, we compared how well AMF-C and AMF-I families align to a trajectory  
307 maximising grain Zn and Fe concentrations, the two mineral elements most commonly  
308 lacking in human diets (White & Broadley, 2009). We defined a family to be better aligned if  
309 the angle between the major axis of the genetic variance-covariance matrices (G-matrix) and  
310 the biofortification target vector was smaller (Fig. 5A; (Noble *et al.*, 2019)). By this criterion,  
311 AMF-C families are better aligned with the biofortification target than AMF-I (Fig. 5B).  
312 Although AMF-I families showed a higher mean grain Fe concentration (27.5 ppm) than  
313 AMF-C families (20.5 ppm), the high Fe concentration was negatively associated with grain  
314 Zn concentration (Fig. 5A). Whereas, AMF-C showed a significantly higher grain Zn  
315 concentration (19.6 ppm) than AMF-I (13.1 ppm), and the association between Zn and Fe is  
316 positive, contributing to its better alignment with biofortification targets. This behaviour was  
317 reflected in the AMF-C conditional QTL qGF1 2.10 that was associated with grain factor1  
318 (GF1) that captured variation in both Zn and Fe (Supplementary Fig. S2). In AMF-C  
319 families, plants homozygous for the CML312 allele at qGF1 2.10 had greater concentrations  
320 of both Zn and Fe in the grain than plants homozygous for the W22 allele, such that selection  
321 for the CML312 allele would align with biofortification targets (Fig. 5C). In AMF-I families  
322 qGF1 2.10 had no significant effect on Zn or Fe concentrations.

323

## 324 **DISCUSSION**

325 We have characterised the impact of AMF on mineral nutrition in field grown maize. Using a  
326 custom mapping resource comprising both AMF-C and AMF-I maize families (hereafter,  
327 mycorrhizal and non-mycorrhizal), we estimated the effect of AMF on the concentrations of  
328 20 elements in the leaves and grain, evaluated the impact of AMF on covariance among  
329 elements, and characterised the host genetic architecture of element accumulation with  
330 respect to the presence or absence of AMF.

331 Although the benefit of AMF in cultivated fields has been questioned (Ryan &  
332 Graham, 2002, 2018), our data suggest that in our trial AMF improved the uptake of essential  
333 nutrients in the field-grown maize. The concentrations of Zn and Cu were significantly higher  
334 in mycorrhizal maize families than in non-mycorrhizal families, in both leaf and grain,  
335 consistent with previous studies (Lehmann *et al.*, 2014; Lehmann & Rillig, 2015). It has been  
336 reported that higher grain yield under P fertilisation reduces Zn concentration through a  
337 dilution effect (Zhang *et al.*, 2021). Our results showed that mycorrhizal plants maintained  
338 greater Zn concentration even though total grain weight per plant was also higher than that of  
339 non-mycorrhizal plants (Ramírez-Flores *et al.*, 2020). In parallel with an increase in essential  
340 micronutrients, mycorrhizal plants showed a significant reduction in the concentration of  
341 potentially toxic elements, including Ni and Cd in grain and As and Mn in leaf and grain,  
342 again consistent with previous greenhouse studies (Göhre & Paszkowski, 2006; Lehmann &  
343 Rillig, 2015; Neidhardt, 2021). As in the pentavalent form of arsenate ( $\text{AsO}_4^{3-}$ ) is chemically  
344 similar to inorganic phosphate ( $\text{PO}_4^{3-}$ ) and the two can compete for transport through the P  
345 uptake system (Meharg & Hartley-Whitaker, 2002). AMF have been reported to reduce As  
346 uptake by down-regulating transporters involved in the direct P uptake pathway  
347 (Christophersen *et al.*, 2009; Li *et al.*, 2018a). We found that a significant correlation  
348 between P and As in the leaves of non-colonised plants was no longer significant in  
349 mycorrhizal plants, supporting an effect of AMF in changing the As-P relationship. More  
350 generally, we found mycorrhizal colonisation altered patterns of covariance among elements,  
351 broadly supporting previous greenhouse studies (Gerlach *et al.*, 2015; Ramírez-Flores *et al.*,  
352 2017), although some specific patterns differed.

353 Alongside the desirable effects described above, we saw a potentially deleterious  
354 reduction in the concentration of the essential micronutrient Fe in both the leaves and grain of  
355 mycorrhizal plants. In addition to being essential for plants, Fe deficiency is a widespread  
356 problem in human diets making increasing Fe a major goal of biofortification programs  
357 (Maqbool & Beshir, 2019). Fe reduction in the shoots of different greenhouse grown

358 mycorrhizal plant species has been reported previously (Tran *et al.*, 2019), although AMF  
359 have also been reported to specifically increase Fe concentration in the roots (Watts-Williams  
360 & Cavagnaro, 2014), suggesting an impact of AMF on root-shoot translocation (Ibiang *et al.*,  
361 2017; Xie *et al.*, 2019). The interpretation of AMF effects on Fe is further complicated by  
362 interactions with Zn status (Ibiang *et al.*, 2017). We observed a negative correlation between  
363 Zn and Fe in both the leaves and grain of non-mycorrhizal maize families, in line with  
364 previously reported antagonism between Zn and Fe nutrition in plant shoots (Ibiang *et al.*,  
365 2017). However, this negative relationship between Zn and Fe became positive in the grain of  
366 mycorrhizal plants being Zn a major biofortification target (Maqbool & Beshir, 2019). Our  
367 analysis of G matrix alignment indicated that although the mean grain Fe concentration was  
368 higher in non-mycorrhizal plants, the positive correlation between Zn and Fe in the  
369 mycorrhizal plants would promote simultaneous breeding gains towards an increase in the  
370 two elements. Although our results were obtained for a biallelic population in a single  
371 location, they illustrate a potentially important aspect of the impact of AMF on mineral  
372 nutrition beyond increasing or decreasing concentrations in any given genetic background.

373 We identified 20 element QTLs that showed evidence of interaction with AM status.  
374 All AMF  $\times$  QTL effects were conditional, *i.e.*, these QTL were specific to either mycorrhizal  
375 or non-mycorrhizal plants, although limited statistical power may have prevented  
376 identification of more complex genetic architectures. Nutrient acquisition by direct plant  
377 uptake or via mycorrhizae follows mechanistically and physiologically distinct pathways  
378 (Bucher, 2007; Chiu & Paszkowski, 2019). The contributions of the plant and mycorrhizal  
379 uptake pathways are not simply additive but can be better thought of as alternative strategies,  
380 one or the other dominating under given conditions (Smith *et al.*, 2003). Molecular analyses  
381 have supported this view through the identification of diversified families of plant nutrient  
382 transporters containing members that play specific roles in direct or mycorrhizal uptake and  
383 are regulated accordingly (Casieri *et al.*, 2012; Yang *et al.*, 2012; Koegel *et al.*, 2013; Li *et*  
384 *al.*, 2018b; Hui *et al.*, 2022). Our identification of conditional QTL is consistent with  
385 variation in such pathway-specific genetic components, the resulting impact being expressed  
386 preferentially in mycorrhizal or non-mycorrhizal plants. We would hypothesise that typically  
387 the balance between direct and mycorrhizal uptake differs spatially across the root system  
388 and temporally over the lifetime of the plant, as well as with respect to host genotype. In  
389 addition to delivery of nutrients to the arbuscule, AMF secondarily impacts nutrient uptake  
390 through enhancement of root growth and modulation of root development (Ramírez-Flores *et*

391 *al.*, 2019). As such, AM symbiosis has the capacity to both mask or exaggerate variation in  
392 direct nutrient uptake among host genotypes, a further potential contribution to AMF  $\times$  QTL  
393 effects. For example, our study identified an AMF-specific QTL for Cd in leaf and grain  
394 ( $qCd_{lf/gr}2.05$ ). This QTL co-localized with a major locus for maize grain Cd accumulation in  
395 a previous study that has been identified as encoding a heavy metal transporter (*ZmHMA3*)  
396 (Tang *et al.*, 2021; Chen *et al.*, 2022). AMF have been reported to up-regulate the expression  
397 of the orthologous transporter gene in rice, and thus promote sequestration of Cd to vacuoles  
398 of root cells and reduce the translocation of Cd from roots to shoots (Chen *et al.*, 2019; Zhu *et*  
399 *al.*, 2022). AMF may also contribute to Cd tolerance in maize through influencing the  
400 function of important host Cd transporters, although our results suggest the efficacy of this  
401 protection is contingent on the host genetic background.

402         Root internal colonisation is widely used to characterise the strength of the AMF-host  
403 relationship. However, quantifying colonisation typically involves destructive root harvest,  
404 staining, and microscopic examination, making it both labour intensive and time consuming.  
405 Variation temporally over development and spatially over the root system also make  
406 estimation difficult, especially when small, localised samples are collected from the large,  
407 and largely inaccessible, root systems of field grown plants. As such, any molecular,  
408 metabolic or other indicators that predict colonisation but can be quantified from aerial parts  
409 of the plants are of great potential utility (*e.g.*, the foliar blumenols described by Wang *et al.*,  
410 2018). Our analysis suggests that components of the leaf and grain ionome have the capacity  
411 to predict AM colonisation. Although we anticipate that any model would have to be trained  
412 on a per field/year/population basis, and therefore necessitate some direct root observation,  
413 there would still be a great saving of time and effort, especially for large scale field studies.  
414 Our models explained, in general, significant variation in the whole dataset ( $R^2_{WD}$ ), but  
415 performed poorly when evaluated in the testing dataset ( $R^2_T$ ), a behaviour consistent with an  
416 overfitted model (Ying 2019). This might be the result of a limited dataset consisting of 75  
417 mycorrhizal families, which is then divided into a training and testing set, coupled with the  
418 possible presence of noise in the colonisation trait values due to the difficulties in their  
419 evaluation discussed above. We hypothesise that a larger dataset might ease the overfitting  
420 effect and lead to more conservative results; nevertheless, the modelling approaches we have  
421 used identify the most informative predictors from a larger potential set and, given the data, it  
422 would be straightforward to combine metabolic, ionic or other indicators in a single  
423 analysis. Mapping the genetic basis of variation in root colonisation is challenging, and where

424 attempted the most informative markers in a given experiment have only described a small  
425 proportion of the total variation (0.82-1.14% in winter wheat (Lehnert *et al.*, 2017), 6.5% in  
426 maize (Kaeppeler *et al.*, 2000), 8% in sorghum (Leiser *et al.*, 2016), 7-16% in durum wheat  
427 (De Vita *et al.*, 2018) and 4.5-7.1% in soybean (Pawlowski *et al.*, 2020)). To date, perhaps  
428 the only clear single gene natural variant effect on colonisation to be characterised is that of  
429 the Dongxiang wild rice allele of *OsCERK1* in promoting colonisation with respect to  
430 cultivated varieties (Huang *et al.*, 2020). These results reflect low heritability, in part  
431 potentially a result of the aforementioned difficulties in accurately estimating colonisation  
432 from small root samples. We had more success in identifying QTL using our ionome-  
433 predicted colonisation values than direct observations, which explain ~ 32% of the variation  
434 in predicted arbuscules and hyphae, indicating that for any given individual estimates based  
435 on a field-scale trained ionome model may be more accurate than direct observation of a root  
436 sample.

437         The co-localisation of our AMF conditional element QTL and those identified in a far  
438 larger study carried out across multiple years and locations (Asaro *et al.*, 2016), albeit  
439 without consideration of AMF, strongly supports the signals we observed. Furthermore, our  
440 observation of AMF conditionality associated with QTL that showed  $G \times E$  in the previous  
441 work is consistent with the hypothesis that variation in AMF communities is contributing to  
442  $G \times E$  effects. For example, our data indicate that plant genetic variation in the gene *ZmHma3*  
443 (Tang *et al.*, 2021; Chen *et al.*, 2022) located at qCd\_2.05 will have the greatest impact on  
444 plant Cd concentration in the field when the local AMF community is strong. More generally,  
445 the AMF contribution to crop  $G \times E$  is central to any proposition to breed towards superior  
446 AMF interactions. In the absence of a significant contribution of AMF to  $G \times E$ , an improved  
447 local AMF community (however defined or promoted) will benefit all plant varieties equally  
448 with no need to consider the plants themselves. If, however, the impact of AMF is conditional  
449 of the host genotype (*e.g.*, (Ramírez-Flores *et al.*, 2020)) we cannot suppose that crop  
450 varieties selected for yield in, for example, an AMF poor environment, will necessarily obtain  
451 the greatest benefit for efforts to improve the AMF community in cultivated fields.

452

## 453 **MATERIALS AND METHODS**

### 454 *Plant material and experimental design*

455 AMF-compatible and AMF-incompatible maize F2:3 families were developed from the cross  
456 between a stock homozygous for the *castor-2* allele in the W22 background and a subtropical  
457 CIMMYT inbred line CML312. The experiment was conducted in the summer of 2019 at the  
458 UNISEM experimental station in Ameca, Jalisco, Mexico (20.57, -104.04). The field was  
459 fertilised at planting with 250 kg/ha of diammonium phosphate (DAP; 18-46-00 NPK) and  
460 again at 40 days after planting with 250 kg/ha of urea (46-00-00, NPK). A total of 73 AMF-C  
461 and 64 AMF-I families were planted in 3-row plots in 3 complete blocks. Within blocks,  
462 AMF-C and AMF-I families were alternated with the order of the families randomised within  
463 each block. Further details of the mapping population and experimental design are presented  
464 in (Ramírez-Flores *et al.*, 2020).

#### 465 ***Determination of elemental concentration by inductively coupled plasma mass*** 466 ***spectrometry***

467 Five flag leaves were collected per plot at flowering and oven dried at 70°C for 48 hours.  
468 After drying, 10 cm from the tip were taken from each flag leaf and were pooled to obtain  
469 one sample per plot. For the grain samples, 4 kernels were selected randomly from 1-3 ears  
470 per plot. Element concentration was determined as described previously (Ramírez-Flores *et*  
471 *al.*, 2017). Briefly, flag leaves and grain samples were analysed by ICP-MS to determine the  
472 concentration of 20 elements. Samples were digested in 2.5 mL concentrated nitric acid (AR  
473 Select Grade, VWR) with an added internal standard (20 ppb In, BDH Aristar Plus).  
474 Concentration of the elements Al, As, B, Ca, Cd, Co, Cu, Fe, K, Mg, Mn, Mo, Na, Ni, P, Rb,  
475 S, Se, Sr and Zn was measured using an Elan 6000 DRC-e mass spectrometer (Perkin-Elmer  
476 SCIEX) connected to a PFA microflow nebulizer (Elemental Scientific) and Apex HF  
477 desolvator (Elemental Scientific). A control solution was run every tenth sample to correct  
478 for machine drift both during a single run and between runs.

#### 479 ***Root sampling and quantification of mycorrhizal colonisation***

480 At the flowering time, one plant per row was excavated in a soil monolith (~15-20 cm from  
481 the stalk and 15 cm to 20 cm in depth) using shovels. Gently, the plant was pulled out and  
482 shaken to remove as much soil as possible. Twenty root pieces were randomly sampled from  
483 a root system and placed in 50mL Falcon Tubes. For the staining, roots were cleared with  
484 10% potassium hydroxide and heated in an autoclave cycle of 15-20 minutes at 121°C.  
485 Cleared roots were stained with 0.05% trypan blue solution in a mixture of 1:1:1 acetic acid,  
486 glycerol and water. To quantify AMF colonisation, 15 stained roots were mounted in a slide.

487 Randomly 135 selected microscope fields were observed, and a modified intersections  
488 method was used to determine fungal colonisation (McGonigle et al., 1990).

#### 489 ***Data cleaning and processing***

490 All data preparation and analyses were performed in R 4.0.4 (R Core Team 2022). Data was  
491 trimmed to remove outliers per element/tissue using R/ graphics::boxplot default criteria, and  
492 were adjusted on a per block basis to a spline fitted model using R/stats::smooth.spline  
493 against row number to reduce spatial variation at the subblock scale. Mean differences  
494 between element concentrations of AMF-C and AMF-I families in leaves and grain were  
495 tested by Wilcoxon test with p-values adjusted based on the number of elements using the  
496 FDR adjustment method. To further explore the differences of element accumulation between  
497 AMF-C and AMF-I families, mycorrhizal responses (MR) of element accumulation were  
498 calculated for each element in leaves and grain using the equation:  $MR = ((AMF-C - AMF-$   
499  $I)/AMF-I)*100\%$  (Watts-Williams *et al.*, 2013).

#### 500 ***Mixed effects linear models***

501 The ionic data collected was collapsed into a single median value per plot for grain and  
502 leaf independently. The dataset contained 450 observations for 66 AMF-I and 75 AMF-C  
503 families of the F<sub>2:3</sub> population in 3 different blocks. For each element, a mixed effects linear  
504 model was fitted using the restricted maximum-likelihood method with R/lme4::lmer, such  
505 that:

$$506 \quad y_{ijkm} = \mu + B_i + G_j + C_k + \varepsilon_{ijk}$$

507 where the response variable  $y_{ijkm}$  is a function of the overall mean ( $\mu$ ), fixed effect of the  
508 block ( $B_i$ ), random effect of genotype ( $G_j$ ), and a fixed effect of the AMF status (AMF-  
509 I/AMF-C;  $C_k$ ), and the residual. Best linear unbiased prediction (BLUP) values for the  
510 genotypic effect (G) were extracted using R/lme4::ranef. We calculated fitted values by  
511 adding BLUPs to the grand mean for data visualisation and downstream analyses using  
512 natural units. Broad-sense heritability for each continuous trait was estimated based on the  
513 linear mixed model results using the *bwardr::Cullis\_H2* function according to (Cullis *et al.*,  
514 2006).

#### 515 ***Multivariate analyses***



516 Fitted values of element B, Na, Al, Se, and Rb showed low variation in either leaf or grain  
517 and were removed in the multivariate analyses. To analyse major sources of variation and  
518 visualise the element accumulation patterns between AMF-C and AMF-I in leaf and grain, a  
519 PCA was conducted using the `stats::prcomp` function in R. We also calculated the Euclidean  
520 distances between centroids of AMF-C and AMF-I families in leaf and grain using the  
521 `usedist::dist_to_centroids` function (Bittinger 2020). Factor analysis was performed to reduce  
522 the dimension of element accumulation patterns and extract underlying latent variables that  
523 share common trends in differentiating AMF-C and AMF-I. Factor analysis was conducted  
524 using the `stats::factanal` function, with the ‘varimax’ rotation method. The first five factors  
525 for grain and leaf were used in the QTL mapping analysis. Detailed loading and scores from  
526 the five factors are included in the supplementary dataset.

527 We calculated pairwise correlations among elements for both AMF-C and AMF-I  
528 groups to explore changes in element correlation patterns in response to AMF colonisation.  
529 Correlations between elements were performed using `stats::cor` with spearman correlation  
530 method. To test whether correlation matrices are equal between AMF-C and AMF-I, Chi-  
531 square test was performed using the `decorate::delaneau.test` (Hoffman 2021).

532 Correlations changed in many pairs of elements from AMF-C to AMF-I in our study.  
533 We then manually picked pairs of elements that showed large differences in direction or  
534 magnitude of correlations between AMF-C and AMF-I families and calculated their ratios  
535 and log transformed for further QTL mapping analysis.

### 536 ***QTL mapping***

537 QTL mapping was performed as described in (Ramírez-Flores *et al.*, 2020) using the `{qtl}`  
538 package in R (Broman *et al.*, 2003). As phenotypic inputs, the BLUPs for leaf and grain  
539 element concentration, ratios, factor scores were used. For mycorrhizal colonisation  
540 phenotypes, the median and logit transformed medians were used. Single-QTL standard  
541 interval mapping was run using `scanone` function with Haley-Knott regression model and  
542 standard parameters. The genotype at *castor* was treated as a covariate (AMF-C = 1; AMF-C  
543 = 0; hereafter AMF) for further modelling. To identify any AMF  $\times$  QTL interaction (Broman  
544 & Sen, 2009), four models were considered for mapping: separate analysis on AMF-I ( $H_{0I}$ )  
545 and AMF-C ( $H_{0C}$ ) families, and models considering AMF as an additive ( $H_a$ ) or interactive  
546 ( $H_f$ ) covariate. The LOD significance threshold was established with a permutation test (1000  
547 permutations,  $\alpha = 0.1$ ). Evidence for AMF  $\times$  QTL interaction was obtained by comparing  $H_f$

548 and  $H_a$  models, where the difference  $LOD_i = LOD_f - LOD_a$  was compared to the threshold  
549 difference  $LOD_{thr_i} = LOD_{thr_f} - LOD_{thr_a}$  for evidence of possible interaction.  
550 Individually detected QTLs were combined into a multiple-QTL model on a per phenotype  
551 basis. Where evidence was found of  $AMF \times QTL$  interaction in the single scan, the  
552 interaction was also included in the multiple-QTL model. Multiple-QTL models were  
553 evaluated using the *fitqtl* function and non-significant ( $\alpha = 0.1$ ) terms removed according to  
554 the drop-one table.

### 555 ***Random forest modelling of AMF colonisation levels***

556 A machine learning approach was used to explain and predict the relationship between the  
557 ionome and the colonisation level of the AMF-C families using the tidymodels framework  
558 (Kuhn & Wickham, 2020). To study the ability of the ionic data of different tissues to  
559 explain the observed colonisation phenotypes, three models with different potential predictors  
560 were considered: *ion-leaf*, considering only the grain ionic variables as predictors; *ion-*  
561 *seed*, considering only the leaf ionome variables as predictor; and *ion-everything*,  
562 considering both leaf and grain ionome variables and element ratios as predictors. To  
563 improve the robustness of the prediction, five different seeds for the random number  
564 generator were used (54955149, 100, 22051959, 2500, 161921). The AMF-C subset ( $n = 75$ )  
565 was split into a training and testing set (75% and 25% of the data, respectively) using the  
566 different seed numbers, consisting of five different training sets. The resulting training  
567 subsets were used to perform a feature selection process using the {Boruta} package for R  
568 (Kursa & Rudnicki 2010) in five bootstrap replicates of the training set. The feature was  
569 deemed as relevant if it was selected by the algorithm in at least 20 out of 25 of the  
570 seed/bootstrap combinations. The models without features that comply with these  
571 characteristics were dropped. Selected features were used as predictors for two different tree  
572 ensemble machine learning algorithms: Random Forest modelling was conducted using the  
573 {ranger} package (Wright & Ziegler, 2017), and Extreme Gradient Boosting was conducted  
574 using the {xgboost} package (Chen & Guestrin, 2016). The number of variables to possibly  
575 split at each node, minimal node size and the number of trees for each model/seed/algorithm  
576 hyperparameters were optimised independently by cross validation ( $vfolds = 3$ ,  $repeats = 10$ )  
577 according to (Kuhn & Silge 2022). The model was finalised with the best combination of  
578 hyperparameters and fit with the training set. The trained models were used to predict the  
579 values on the training and whole data set, and the average of the prediction of the five

580 different random seeds was considered as the true prediction of the model. The performance  
581 of the model was evaluated according to the testing squared r metric.

### 582 ***Selection trajectory analysis***

583 To understand the impact of AMF colonisation on the genetic architecture of element  
584 accumulations and the evolvability to meet future biofortification breeding targets, we  
585 applied an evolutionary quantitative genetic approach by quantifying the alignment between  
586 genetic variation and the evolutionary trajectory towards maximised biofortification goals.  
587 The biofortification goal was defined to obtain maximised grain Zn and Fe as set by  
588 HarvestPlus as 38 µg/g dry weight for Zn and 60 µg/g dry weight for Fe (Bouis *et al.*, 2011).  
589 We extracted genetic variance-covariance matrices (G-matrix) by fitting Generalised Linear  
590 Mixed models using Markov Chain Monte Carlo techniques (MCMCglmm) in R. Briefly, the  
591 pedigree information was inverted to obtain an inverse sparse matrix, which was then used in  
592 the MCMCglmm model with a non-informative prior. The evolvability of crops to meet  
593 biofortification targets were determined as the alignment between the main axes of G-matrix  
594 and the biofortification target vector (calculated as differences in multivariate trait means  
595 from the breeding targets) as described in (Noble *et al.*, 2019).

596

### 597 **ACKNOWLEDGEMENT**

598 This study was funded by the Mexican Comision Nacional para el Conocimiento y Uso de la  
599 Biodiversidad (CONABIO) project *Impact of native arbuscular mycorrhizal fungi on maize*  
600 *performance* (N° 62, 2016–2018). RJHS is funded by USDA Hatch Appropriations under  
601 Project #PEN04734 and Accession #1021929. GZ and IB were supported by Danforth Center  
602 internal funds.

603

### 604 **COMPLETING INTERESTS**

605 The authors declare no completing interests.

606

### 607 **AUTHOR CONTRIBUTIONS**

608 MRRF and RJHS conceived and designed the experiment. MRRF, SPL, BBG, MAMM, GZ,  
609 IB contributed to the sample collection and analysis. ML and SPL conducted the data  
610 analyses. ML, SPL, MRRF, and RJHS wrote the original draft. All authors contributed to the  
611 reviewing and revising of the manuscript.

612

## 613 DATA AVAILABILITY

614 Genotype and phenotype data and supplementary dataset are provided on Figshare under the

615 doi's: <https://doi.org/10.6084/m9.figshare.21684947> and

616 <https://doi.org/10.6084/m9.figshare.12869867>.

617

## 618 REFERENCES

619 **Asaro A, Ziegler G, Ziyomo C, Hoekenga OA, Dilkes BP, Baxter I. 2016.** The Interaction  
620 of Genotype and Environment Determines Variation in the Maize Kernel Ionome. *G3* **6**:  
621 4175–4183.

622 **Baxter I. 2015.** Should we treat the ionome as a combination of individual elements, or  
623 should we be deriving novel combined traits? *Journal of experimental botany* **66**: 2127–2131.

624 **Bouis HE, Hotz C, McClafferty B, Meenakshi JV, Pfeiffer WH. 2011.** Biofortification: a  
625 new tool to reduce micronutrient malnutrition. *Food and nutrition bulletin* **32**: S31–40.

626 **Bowles TM, Barrios-Masias FH, Carlisle EA, Cavagnaro TR, Jackson LE. 2016.** Effects  
627 of arbuscular mycorrhizae on tomato yield, nutrient uptake, water relations, and soil carbon  
628 dynamics under deficit irrigation in field conditions. *The Science of the total environment*  
629 **566-567**: 1223–1234.

630 **Broman KW, Sen S. 2009.** *A Guide to QTL Mapping with R/qtl*. Springer Science &  
631 Business Media.

632 **Broman KW, Wu H, Sen S, Churchill GA. 2003.** R/qtl: QTL mapping in experimental  
633 crosses. *Bioinformatics* **19**: 889–890.

634 **Bucher M. 2007.** Functional biology of plant phosphate uptake at root and mycorrhiza  
635 interfaces. *New phytologist* **173**: 11–26.

636 **Buysens C, Dupré de Boulois H, Declerck S. 2015.** Do fungicides used to control  
637 *Rhizoctonia solani* impact the non-target arbuscular mycorrhizal fungus *Rhizophagus*  
638 *irregularis*? *Mycorrhiza* **25**: 277–288.

639 **Casieri L, Gallardo K, Wipf D. 2012.** Transcriptional response of *Medicago truncatula*

- 640 sulphate transporters to arbuscular mycorrhizal symbiosis with and without sulphur stress.  
641 *Planta* **235**: 1431–1447.
- 642 **Chen Y, Chao Z-F, Jin M, Wang Y-L, Li Y, Wu J-C, Xiao Y, Peng Y, Lv Q-Y, Gui S, et**  
643 **al. 2022.** A heavy metal transporter gene ZmHMA3a promises safe agricultural production  
644 on cadmium-polluted arable land. *Journal of genetics and genomics* doi:  
645 *10.1016/j.jgg.2022.08.003*
- 646 **Chen T, Guestrin C. 2016.** XGBoost: A Scalable Tree Boosting System. In: KDD '16.  
647 Proceedings of the 22nd ACM SIGKDD International Conference on Knowledge Discovery  
648 and Data Mining. New York, NY, USA: Association for Computing Machinery, 785–794.
- 649 **Chen XW, Wu L, Luo N, Mo CH, Wong MH, Li H. 2019.** Arbuscular mycorrhizal fungi  
650 and the associated bacterial community influence the uptake of cadmium in rice. *Geoderma*  
651 **337**: 749–757.
- 652 **Chiu CH, Paszkowski U. 2019.** Mechanisms and Impact of Symbiotic Phosphate  
653 Acquisition. *Cold Spring Harbor perspectives in biology* **11**.
- 654 **Christophersen HM, Smith FA, Smith SE. 2009.** Arbuscular mycorrhizal colonization  
655 reduces arsenate uptake in barley via downregulation of transporters in the direct epidermal  
656 phosphate uptake pathway. *The New phytologist* **184**: 962–974.
- 657 **Cobb AB, Duell EB, Haase KB, Miller RM, Wu YQ, Wilson GWT. 2021.** Utilizing  
658 mycorrhizal responses to guide selective breeding for agricultural sustainability. *PLANTS,*  
659 *PEOPLE, PLANET* **3**: 578–587.
- 660 **Cullis BR, Smith AB, Coombes NE. 2006.** On the design of early generation variety trials  
661 with correlated data. *Journal of agricultural, biological, and environmental statistics* **11**: 381.
- 662 **De Vita P, Avio L, Sbrana C, Laidò G, Marone D, Mastrangelo AM, Cattivelli L,**  
663 **Giovannetti M. 2018.** Genetic markers associated to arbuscular mycorrhizal colonization in  
664 durum wheat. *Scientific reports* **8**: 10612.
- 665 **Fabiańska I, Pesch L, Koebke E, Gerlach N, Bucher M. 2020.** Neighboring plants  
666 divergently modulate effects of loss-of-function in maize mycorrhizal phosphate uptake on  
667 host physiology and root fungal microbiota. *PloS one* **15**: e0232633.

668 **Feldmann F. 2009.** *Crop Plant Resistance to Biotic and Abiotic Factors: Current Potential*  
669 *and Future Demands ; Proceedings of the 3rd International Symposium on Plant Protection*  
670 *and Plant Health in Europe, Held at the Julius-Kühn-Institut, Berlin-Dahlem, Germany, 14 -*  
671 *16 May 2009.* DPG.

672 **Gabriel Hoffman (2021).** decorate: Differential Epigenetic Coregulation Test. R package  
673 version 1.0.29. <https://github.com/GabrielHoffman/decorate>

674 **Gagnon B, Ziadi N, Bélanger G, Parent G. 2020.** Validation and use of critical phosphorus  
675 concentration in maize. *European journal of agronomy: the journal of the European Society*  
676 *for Agronomy* **120**: 126147.

677 **Gerlach N, Schmitz J, Polatajko A, Schlüter U, Fahnenstich H, Witt S, Fernie AR,**  
678 **Uroic K, Scholz U, Sonnewald U, et al. 2015.** An integrated functional approach to dissect  
679 systemic responses in maize to arbuscular mycorrhizal symbiosis. *Plant, cell & environment*  
680 **38**: 1591–1612.

681 **Göhre V, Paszkowski U. 2006.** Contribution of the arbuscular mycorrhizal symbiosis to  
682 heavy metal phytoremediation. *Planta* **223**: 1115–1122.

683 **Gupta S, Thokchom SD, Koul M, Kapoor R. 2022.** Arbuscular Mycorrhiza mediated  
684 mineral biofortification and arsenic toxicity mitigation in *Triticum aestivum* L. *Plant Stress*  
685 **5**: 100086.

686 **Harrison MJ, Dewbre GR, Liu J. 2002.** A phosphate transporter from *Medicago truncatula*  
687 involved in the acquisition of phosphate released by arbuscular mycorrhizal fungi. *The Plant*  
688 *cell* **14**: 2413–2429.

689 **Hart MM, Forsythe JA. 2012.** Using arbuscular mycorrhizal fungi to improve the nutrient  
690 quality of crops; nutritional benefits in addition to phosphorus. *Scientia horticultrae* **148**:  
691 206–214.

692 **van der Heijden MGA, Martin FM, Selosse M-A, Sanders IR. 2015.** Mycorrhizal ecology  
693 and evolution: the past, the present, and the future. *The New phytologist* **205**: 1406–1423.

694 **Huang R, Li Z, Mao C, Zhang H, Sun Z, Li H, Huang C, Feng Y, Shen X, Bucher M, et**  
695 **al. 2020.** Natural variation at *OsCERK1* regulates arbuscular mycorrhizal symbiosis in rice.

- 696 *The New phytologist* **225**: 1762–1776.
- 697 **Hui J, An X, Li Z, Neuhäuser B, Ludewig U, Wu X, Schulze WX, Chen F, Feng G,**  
698 **Lambers H, et al. 2022.** The Mycorrhiza-Specific Ammonium Transporter ZmAMT3;1  
699 Mediates Mycorrhiza-dependent Nitrogen Uptake in Maize Roots. *The Plant cell*. **34** (10):  
700 4066–4087
- 701 **Ibiang YB, Mitsumoto H, Sakamoto K. 2017.** Bradyrhizobia and arbuscular mycorrhizal  
702 fungi modulate manganese, iron, phosphorus, and polyphenols in soybean ( *Glycine max* (L.)  
703 Merr.) under excess zinc. *Environmental and experimental botany* **137**: 1–13.
- 704 **Kaeppler SM, Parke JL, Mueller SM, Senior L, Stuber C, Tracy WF. 2000.** Variation  
705 among maize inbred lines and detection of quantitative trait loci for growth at low  
706 phosphorus and responsiveness to arbuscular mycorrhizal fungi. *Crop science* **40**: 358–364.
- 707 **Koegel S, Ait Lahmidi N, Arnould C, Chatagnier O, Walder F, Ineichen K, Boller T,**  
708 **Wipf D, Wiemken A, Courty P-E. 2013.** The family of ammonium transporters (AMT) in  
709 *Sorghum bicolor*: two AMT members are induced locally, but not systemically in roots  
710 colonized by arbuscular mycorrhizal fungi. *New phytologist* **198**: 853–865.
- 711 **Kuhn M, Silge J. 2022** Tidy Modeling with R. *O'Reilly Media, Inc*
- 712 **Kuhn M, Wickham H. 2020.** Tidymodels: a collection of packages for modeling and  
713 machine learning using tidyverse principles. <https://www.tidymodels.org/>
- 714 **Kursa, Rudnicki. 2010** Feature Selection with the Boruta Package. *Journal of statistical*  
715 *software*. **36**(11), 1–13. <https://doi.org/10.18637/jss.v036.i11>
- 716 **Kyle Bittinger 2020** usedist: Distance Matrix Utilities. R package version 0.4.0.  
717 <https://CRAN.R-project.org/package=usedist>
- 718 **Lahner B, Gong J, Mahmoudian M, Smith EL, Abid KB, Rogers EE, Guerinot ML,**  
719 **Harper JF, Ward JM, McIntyre L, et al. 2003.** Genomic scale profiling of nutrient and  
720 trace elements in *Arabidopsis thaliana*. *Nature biotechnology* **21**: 1215–1221.
- 721 **Lehmann A, Rillig MC. 2015.** Arbuscular mycorrhizal contribution to copper, manganese  
722 and iron nutrient concentrations in crops – A meta-analysis. *Soil biology & biochemistry* **81**:  
723 147–158.

- 724 **Lehmann A, Veresoglou SD, Leifheit EF, Rillig MC. 2014.** Arbuscular mycorrhizal  
725 influence on zinc nutrition in crop plants – A meta-analysis. *Soil biology & biochemistry* **69**:  
726 123–131.
- 727 **Lehnert H, Serfling A, Enders M, Friedt W, Ordon F. 2017.** Genetics of mycorrhizal  
728 symbiosis in winter wheat (*Triticum aestivum*). *The New phytologist* **215**: 779–791.
- 729 **Leiser WL, Olatoye MO, Rattunde HFW, Neumann G, Weltzien E, Haussmann BIG.**  
730 **2016.** No need to breed for enhanced colonization by arbuscular mycorrhizal fungi to  
731 improve low-P adaptation of West African sorghums. *Plant and soil* **401**: 51–64.
- 732 **Li J, Sun Y, Jiang X, Chen B, Zhang X. 2018a.** Arbuscular mycorrhizal fungi alleviate  
733 arsenic toxicity to *Medicago sativa* by influencing arsenic speciation and partitioning.  
734 *Ecotoxicology and environmental safety* **157**: 235–243.
- 735 **Li M, Wang R, Tian H, Gao Y. 2018b.** Transcriptome responses in wheat roots to  
736 colonization by the arbuscular mycorrhizal fungus *Rhizophagus irregularis*. *Mycorrhiza* **28**:  
737 747–759.
- 738 **Maqbool MA, Beshir A. 2019.** Zinc biofortification of maize (*Zea mays*L.): Status and  
739 challenges. *Plant breeding* **138**: 1–28.
- 740 **Meharg AA, Hartley-Whitaker J. 2002.** Arsenic uptake and metabolism in arsenic resistant  
741 and nonresistant plant species. *The New phytologist* **154**: 29–43.
- 742 **Montero H, Choi J, Paszkowski U. 2019.** Arbuscular mycorrhizal phenotyping: the dos and  
743 don'ts. *The New phytologist* **221**: 1182–1186.
- 744 **Neidhardt H. 2021.** Arbuscular mycorrhizal fungi alleviate negative effects of arsenic-  
745 induced stress on crop plants: A meta-analysis. *PLANTS, PEOPLE, PLANET* **3**: 523–535.
- 746 **Nguyen TD, Cavagnaro TR, Watts-Williams SJ. 2019.** The effects of soil phosphorus and  
747 zinc availability on plant responses to mycorrhizal fungi: a physiological and molecular  
748 assessment. *Scientific reports* **9**: 14880.
- 749 **Noble DWA, Radersma R, Uller T. 2019.** Plastic responses to novel environments are  
750 biased towards phenotype dimensions with high additive genetic variation. *Proceedings of*  
751 *the National Academy of Sciences of the United States of America* **116**: 13452–13461.



- 752 **Ortas I. 2012.** The effect of mycorrhizal fungal inoculation on plant yield, nutrient uptake  
753 and inoculation effectiveness under long-term field conditions. *Field crops research* **125**: 35–  
754 48.
- 755 **Paszkowski U, Kroken S, Roux C, Briggs SP. 2002.** Rice phosphate transporters include an  
756 evolutionarily divergent gene specifically activated in arbuscular mycorrhizal symbiosis.  
757 *Proceedings of the National Academy of Sciences of the United States of America* **99**: 13324–  
758 13329.
- 759 **Pawlowski ML, Vuong TD, Valliyodan B, Nguyen HT, Hartman GL. 2020.** Whole-  
760 genome resequencing identifies quantitative trait loci associated with mycorrhizal  
761 colonization of soybean. *TAG. Theoretical and applied genetics* **133**: 409–417.
- 762 **Pellegrino E, Bedini S. 2014.** Enhancing ecosystem services in sustainable agriculture:  
763 Biofertilization and biofortification of chickpea (*Cicer arietinum L.*) by arbuscular  
764 mycorrhizal fungi. *Soil biology & biochemistry* **68**: 429–439.
- 765 **Pepe A, Di Baccio D, Magnani E, Giovannetti M, Sbrana C. 2022.** Zinc and iron  
766 biofortification and accumulation of health-promoting compounds in mycorrhizal *Cichorium*  
767 *intybus L.* *Journal of soil science and plant nutrition.* **22**, 4703–4716.
- 768 **Ramírez-Flores MR, Bello-Bello E, Rellán-Álvarez R, Sawers RJH, Olalde-Portugal V.**  
769 **2019.** Inoculation with the mycorrhizal fungus modulates the relationship between root  
770 growth and nutrient content in maize ( *ssp. L.*). *Plant direct* **3**: e00192.
- 771 **Ramírez-Flores MR, Perez-Limon S, Li M, Barrales-Gamez B, Albinsky D, Paszkowski**  
772 **U, Olalde-Portugal V, Sawers RJ. 2020.** The genetic architecture of host response reveals  
773 the importance of arbuscular mycorrhizae to maize cultivation. *eLife* **9**.
- 774 **Ramírez-Flores MR, Rellán-Álvarez R, Wozniak B, Gebreselassie M-N, Jakobsen I,**  
775 **Olalde-Portugal V, Baxter I, Paszkowski U, Sawers RJH. 2017.** Co-ordinated Changes in  
776 the Accumulation of Metal Ions in Maize (*Zea mays ssp. mays L.*) in Response to Inoculation  
777 with the Arbuscular Mycorrhizal Fungus *Funneliformis mosseae*. *Plant & cell physiology* **58**:  
778 1689–1699.
- 779 **R Core Team. 2022.** R: A Language and Environment for Statistical Computing.

- 780 **Ruytinx J, Kafle A, Usman M, Coninx L, Zimmermann SD, Garcia K. 2020.**  
781 Micronutrient transport in mycorrhizal symbiosis; zinc steals the show. *Fungal biology*  
782 *reviews* **34**: 1–9.
- 783 **Ryan MH, Graham JH. 2002.** Is there a role for arbuscular mycorrhizal fungi in production  
784 agriculture? *Plant and soil* **244**: 263–271.
- 785 **Ryan MH, Graham JH. 2018.** Little evidence that farmers should consider abundance or  
786 diversity of arbuscular mycorrhizal fungi when managing crops. *The New phytologist* **220**:  
787 1092–1107.
- 788 **Salomon MJ, Demarmels R, Watts-Williams SJ, McLaughlin MJ, Kafle A, Ketelsen C,**  
789 **Soupir A, Bücking H, Cavagnaro TR, van der Heijden MGA. 2022.** Global evaluation of  
790 commercial arbuscular mycorrhizal inoculants under greenhouse and field conditions.  
791 *Applied soil ecology: a section of Agriculture, Ecosystems & Environment* **169**: 104225.
- 792 **Salvioli di Fossalunga A, Novero M. 2019.** To trade in the field: the molecular determinants  
793 of arbuscular mycorrhiza nutrient exchange. *Chemical and biological technologies in*  
794 *agriculture* **6**, 12
- 795 **Sawers RJH, Gebreselassie MN, Janos DP, Paszkowski U. 2010.** Characterizing variation  
796 in mycorrhiza effect among diverse plant varieties. *TAG. Theoretical and applied genetics.*  
797 *Theoretische und angewandte Genetik* **120**: 1029–1039.
- 798 **Sawers RJH, Svane SF, Quan C, Grønlund M, Wozniak B, Gebreselassie M-N,**  
799 **González-Muñoz E, Chávez Montes RA, Baxter I, Goudet J, et al. 2017.** Phosphorus  
800 acquisition efficiency in arbuscular mycorrhizal maize is correlated with the abundance of  
801 root-external hyphae and the accumulation of transcripts encoding PHT1 phosphate  
802 transporters. *The New phytologist* **214**: 632–643.
- 803 **Smith SE, Smith FA, Jakobsen I. 2003.** Mycorrhizal fungi can dominate phosphate supply  
804 to plants irrespective of growth responses. *Plant physiology* **133**: 16–20.
- 805 **Tang B, Luo M, Zhang Y, Guo H, Li J, Song W, Zhang R, Feng Z, Kong M, Li H, et al.**  
806 **2021.** Natural variations in the P-type ATPase heavy metal transporter gene ZmHMA3  
807 control cadmium accumulation in maize grains. *Journal of experimental botany* **72**: 6230–  
808 6246.

- 809 **Thirkell TJ, Grimmer M, James L, Pastok D, Allary T, Elliott A, Paveley N, Daniell T,**  
810 **Field KJ. 2022.** Variation in mycorrhizal growth response among a spring wheat mapping  
811 population shows potential to breed for symbiotic benefit. *Food and energy security*. **11**, e370
- 812 **Tran BTT, Watts-Williams SJ, Cavagnaro TR. 2019.** Impact of an arbuscular mycorrhizal  
813 fungus on the growth and nutrition of fifteen crop and pasture plant species. *Functional plant*  
814 *biology: FPB* **46**: 732–742.
- 815 **Wang B, Qiu Y-L. 2006.** Phylogenetic distribution and evolution of mycorrhizas in land  
816 plants. *Mycorrhiza* **16**: 299–363.
- 817 **Wang M, Schäfer M, Li D, Halitschke R, Dong C, McGale E, Paetz C, Song Y, Li S,**  
818 **Dong J, et al. 2018.** Blumenols as shoot markers of root symbiosis with arbuscular  
819 mycorrhizal fungi. *eLife* **7**.
- 820 **Watts-Williams SJ, Cavagnaro TR. 2014.** Nutrient interactions and arbuscular  
821 mycorrhizas: a meta-analysis of a mycorrhiza-defective mutant and wild-type tomato  
822 genotype pair. *Plant and soil* **384**: 79–92.
- 823 **Watts-Williams SJ, Cavagnaro TR. 2015.** Using mycorrhiza-defective mutant genotypes of  
824 non-legume plant species to study the formation and functioning of arbuscular mycorrhiza: a  
825 review. *Mycorrhiza* **25**: 587–597.
- 826 **Watts-Williams SJ, Patti AF, Cavagnaro TR. 2013.** Arbuscular mycorrhizas are beneficial  
827 under both deficient and toxic soil zinc conditions. *Plant and soil* **371**: 299–312.
- 828 **White PJ, Broadley MR. 2009.** Biofortification of crops with seven mineral elements often  
829 lacking in human diets--iron, zinc, copper, calcium, magnesium, selenium and iodine. *The*  
830 *New phytologist* **182**: 49–84.
- 831 **Willmann M, Gerlach N, Buer B, Polatajko A, Nagy R, Koebke E, Jansa J, Flisch R,**  
832 **Bucher M. 2013.** Mycorrhizal phosphate uptake pathway in maize: vital for growth and cob  
833 development on nutrient poor agricultural and greenhouse soils. *Frontiers in plant science* **4**:  
834 533.
- 835 **Wright MN, Ziegler A. 2017.** ranger: A Fast Implementation of Random Forests for High  
836 Dimensional Data in C++ and R. *Journal of Statistical Software* **77**: 1–17.

- 837 **Xie X, Hu W, Fan X, Chen H, Tang M. 2019.** Interactions Between Phosphorus, Zinc, and  
838 Iron Homeostasis in Nonmycorrhizal and Mycorrhizal Plants. *Frontiers in plant science* **10**:  
839 1172.
- 840 **Ying X. 2019.** An Overview of Overfitting and its Solutions. In: Journal of Physics:  
841 Conference Series. Institute of Physics Publishing. **1168**, 2
- 842 **Yang S-Y, Grønlund M, Jakobsen I, Grotemeyer MS, Rentsch D, Miyao A, Hirochika**  
843 **H, Kumar CS, Sundaresan V, Salamin N, et al. 2012.** Nonredundant regulation of rice  
844 arbuscular mycorrhizal symbiosis by two members of the phosphate transporter1 gene family.  
845 *The Plant cell* **24**: 4236–4251.
- 846 **Zhang W, Zhang W, Wang X, Liu D, Zou C, Chen X. 2021.** Quantitative evaluation of the  
847 grain zinc in cereal crops caused by phosphorus fertilization. A meta-analysis. *Agronomy for*  
848 *Sustainable Development* **41**.
- 849 **Zhu Q, Xu P, Lei L, Jing Y. 2022.** Transcriptome analysis reveals decreased accumulation  
850 and toxicity of Cd in upland rice inoculated with arbuscular mycorrhizal fungi. *Applied soil*  
851 *ecology: a section of Agriculture, Ecosystems & Environment* **177**: 104501.
- 852
- 853

854 **Table 1.** Element concentrations (p.p.m) in leaves and grain of mycorrhizal compatible (AMF-C) and incompatible (AMF-I) families. Means  
855 and standard deviation (S.D.) were calculated from 75 and 66 genotypes for AMF-C and AMF-I, respectively. The significance of mean  
856 differences between two families were tested using the Wilcoxon test with p-values adjusted (FDR adjustment) based on the number of  
857 elements. Note: \*: p < 0.05; \*\*: p < 0.01; \*\*\*: p < 0.001; NS: not significant. Broad sense heritability ( $H^2$ ) of the whole mapping population was  
858 estimated using the *bwardr::Cullis\_H2* function for R.  
859

| Element | Leaf    |         |         |         |     |       | Grain |       |       |       |     |       |
|---------|---------|---------|---------|---------|-----|-------|-------|-------|-------|-------|-----|-------|
|         | AMF-C   |         | AMF-I   |         | p   | $H^2$ | AMF-C |       | AMF-I |       | p   | $H^2$ |
|         | Mean    | S.D.    | Mean    | S.D.    |     |       | Mean  | S.D.  | Mean  | S.D.  |     |       |
| Al      | 11.17   | 3.29    | 11.61   | 3.33    | NS  | 0.51  | 0.57  | 0.16  | 0.55  | 0.16  | NS  | 0     |
| As      | 0.04    | 0.02    | 0.07    | 0.02    | *** | 0.65  | 0.01  | 0.002 | 0.01  | 0.002 | *** | 0.26  |
| B       | 18.61   | 3.66    | 16.36   | 4.53    | **  | 0.21  | 0.54  | 0.11  | 0.56  | 0.12  | NS  | 0     |
| Ca      | 6279.35 | 1682.39 | 7040.19 | 1653.11 | *   | 0.64  | 83.57 | 23.97 | 90.79 | 29.70 | NS  | 0.28  |
| Cd      | 0.03    | 0.01    | 0.03    | 0.01    | NS  | 0.73  | 0.004 | 0.002 | 0.005 | 0.002 | *   | 0.58  |
| Co      | 0.06    | 0.02    | 0.06    | 0.02    | NS  | 0.53  | 0.004 | 0.001 | 0.004 | 0.001 | NS  | 0.13  |
| Cu      | 5.57    | 0.94    | 3.25    | 0.90    | *** | 0.69  | 1.71  | 0.30  | 1.03  | 0.37  | *** | 0.4   |

---

|    |          |         |          |         |     |      |         |        |         |        |     |      |
|----|----------|---------|----------|---------|-----|------|---------|--------|---------|--------|-----|------|
| Fe | 75.70    | 14.32   | 117.97   | 31.65   | *** | 0.62 | 20.52   | 2.81   | 27.50   | 6.25   | *** | 0.2  |
| K  | 30672.02 | 3391.24 | 33142.20 | 4283.85 | **  | 0.61 | 5921.39 | 659.15 | 6016.12 | 635.67 | NS  | 0.14 |
| Mg | 2826.21  | 488.60  | 3237.95  | 615.78  | *** | 0.71 | 1813.79 | 168.99 | 1849.13 | 185.64 | NS  | 0.21 |
| Mn | 148.62   | 37.70   | 196.77   | 46.80   | *** | 0.55 | 5.47    | 1.02   | 6.15    | 1.12   | *** | 0.39 |
| Mo | 0.40     | 0.07    | 0.36     | 0.06    | **  | 0.31 | 0.07    | 0.07   | 0.05    | 0.07   | NS  | 0.03 |
| Na | 10.26    | 4.16    | 8.24     | 3.15    | **  | 0.1  | 0.45    | 0.09   | 0.49    | 0.10   | NS  | 0    |
| Ni | 0.04     | 0.01    | 0.03     | 0.01    | **  | 0.17 | 0.03    | 0.01   | 0.03    | 0.01   | *   | 0.46 |
| P  | 2510.42  | 242.64  | 2313.33  | 322.66  | *** | 0.63 | 2662.30 | 281.83 | 2770.97 | 348.63 | NS  | 0.14 |
| Rb | 7.15     | 1.28    | 6.68     | 1.23    | *   | 0.4  | 1.74    | 0.43   | 1.57    | 0.44   | NS  | 0    |
| S  | 3790.03  | 275.70  | 3683.31  | 318.64  | *   | 0.51 | 1970.28 | 244.41 | 2019.22 | 198.12 | NS  | 0.23 |
| Se | 0.02     | 0.01    | 0.02     | 0.00    | **  | 0    | 0.01    | 0.003  | 0.01    | 0.003  | **  | 0    |
| Sr | 27.42    | 9.06    | 30.15    | 7.95    | *   | 0.66 | 0.42    | 0.16   | 0.52    | 0.18   | *   | 0.32 |
| Zn | 40.89    | 8.67    | 18.88    | 8.61    | *** | 0.44 | 19.58   | 3.16   | 13.08   | 3.46   | *** | 0.25 |

---

861 **Figure Legends**

862

863 **Figure 1. Mycorrhizal colonisation affects element concentrations and correlations in**  
864 **field grown maize.**

865

866 **Figure 2. The behaviour of element QTL is contingent on AM status.**

867

868 **Figure 3. QTL specific to AMF-C families colocalize with element QTL showing  $G \times E$**   
869 **in a previously reported multisite evaluation.**

870

871 **Figure 4. The ionome reflects arbuscular mycorrhizal colonisation.**

872

873 **Figure 5. Arbuscular mycorrhizal association may facilitate progress towards**  
874 **biofortification breeding targets.**

875

876

877 **SUPPORTING INFORMATION**

878 **Table S1.** QTLs detected in common with a published multisite ionome analysis.

879 **Figure S1.** Principal Component Analysis biplots showing element concentration patterns  
880 and loadings.

881 **Figure S2.** Loadings showing the contributions of elements to the first five factors of the  
882 Factor Analysis of element concentrations in leaf and grain.

883 **Figure S3.** Random Forest (RF) model results for hyphae abundance.

884 **Figure S4.** Random Forest (RF) model results for vesicle abundance.

885 **Dataset S1** Genotype and phenotype data and supplementary dataset are provided on

886 Figshare under the doi's: <https://doi.org/10.6084/m9.figshare.21684947> and

887 <https://doi.org/10.6084/m9.figshare.12869867>.

888

889

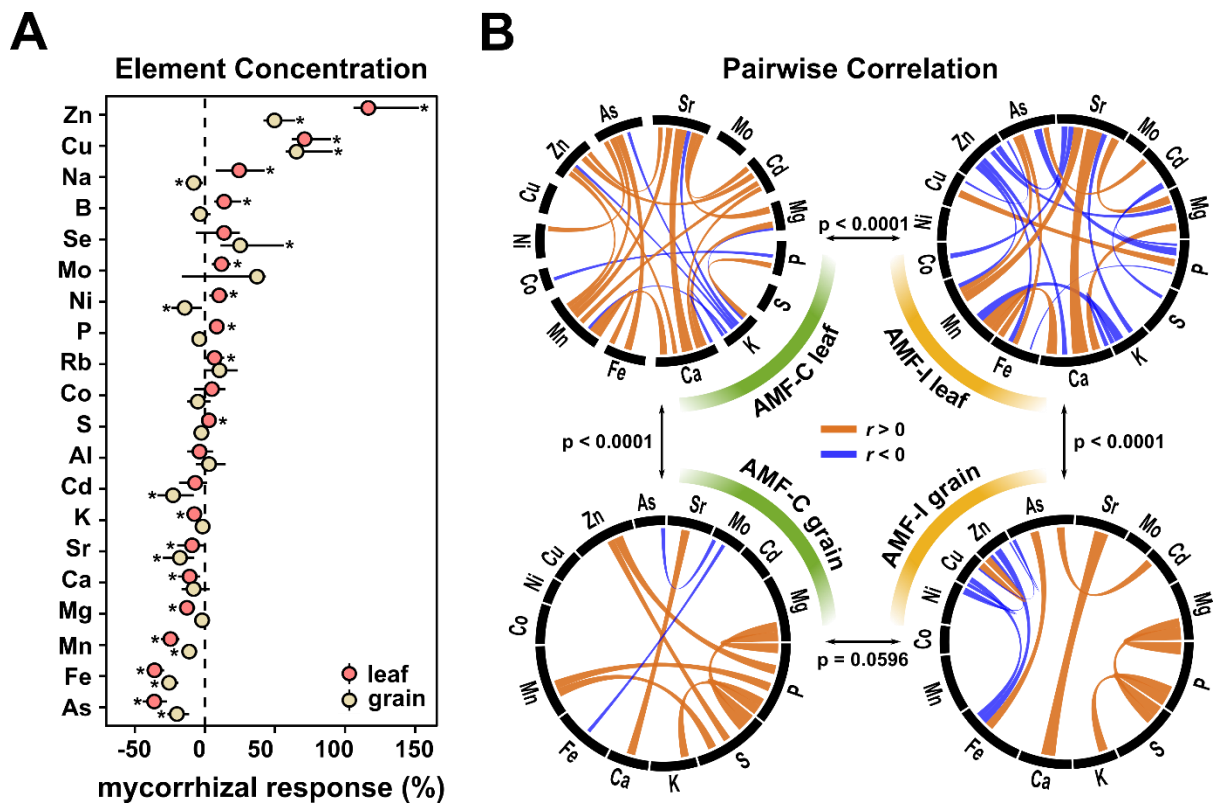

890

891

892 **Figure 1. Mycorrhizal colonisation affects element concentrations and correlations in**

893 **field grown maize.** A) Mycorrhizal responses of element concentration in leaf and grain.

894 Mycorrhizal response of each element was calculated as the mean difference between

895 element concentration in compatible (AMF-C) and incompatible families (AMF-I) divided by

896 AMF-I. Error bars represent 95% confidence intervals. B) Pairwise correlations of element  
897 concentration in leaf (upper) and grain (bottom) between AMF-C (left) and AMF-I (right)

898 families. Significant Spearman correlations ( $p < 0.05$ ) shown with positive correlations in

899 orange and negative correlations in blue. The width of links represents the absolute value of

900 correlation coefficients. Differences in correlation matrices were tested using the Chi-square

901 test.

902

903



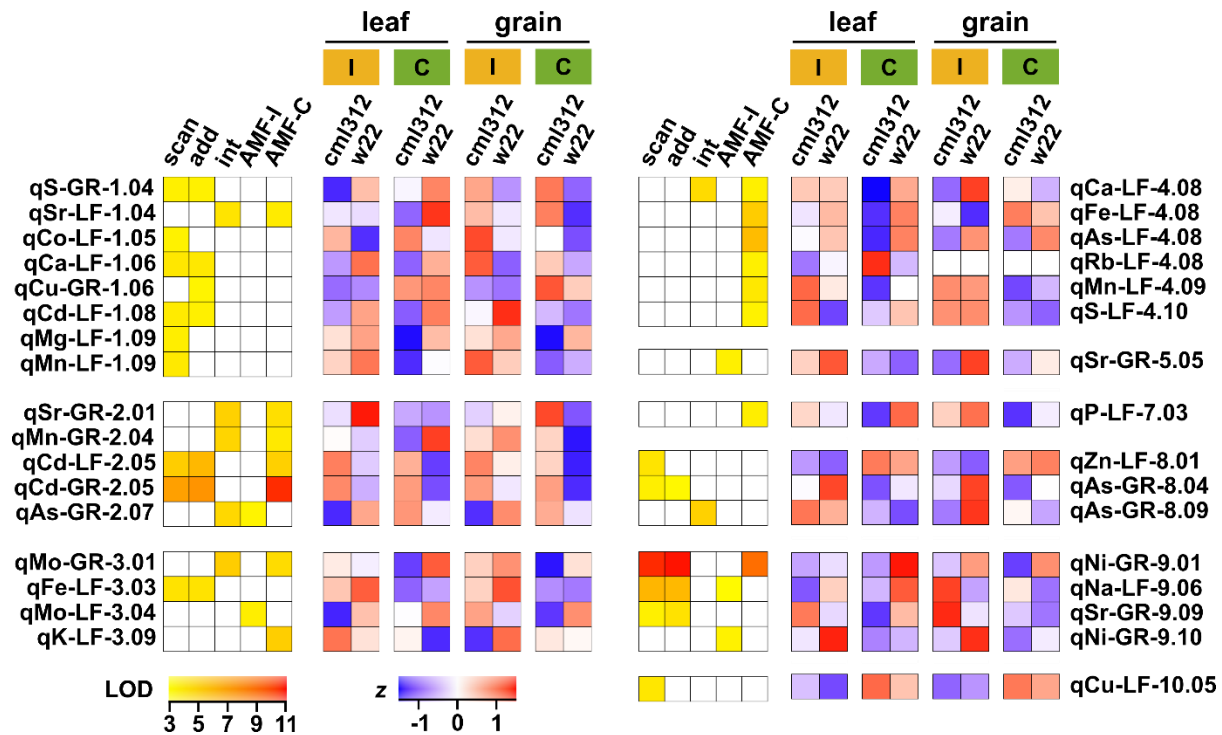

904

905

906

907

908

909

910

911

912

913

914

915

916

917

**Figure 2. The behaviour of element QTL is contingent on AM status.** QTL support (LOD) and allele effects (standardised  $z$  score for W22 or CML312 allele) for significant element QTL. QTL are named for the associated ion, the tissue type (LF for leaf or GR for grain) and the genetic position (chromosome and bin). LOD support is only shown for the models for which the QTL was significant. Models given as *scan* - all families in a single QTL scan; *add* - AMF status as an additive covariate; *int* - AMF status as an interactive covariate; *AMF-I* - separate analysis of AMF-I families; *AMF-C* - separate analysis of AMF-C families. Effect estimates are shown for both leaf and grain, and both AMF-I (I, yellow) and AMF-C (C, green) families irrespective of whether the QTL was significant in any given tissue/AMF status combination. Effects were standardised separately for leaf and grain.

**A**

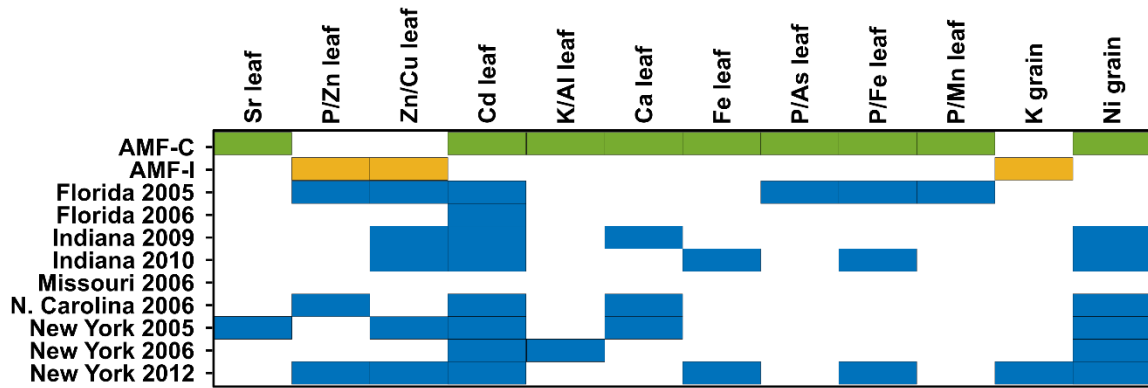

**B**

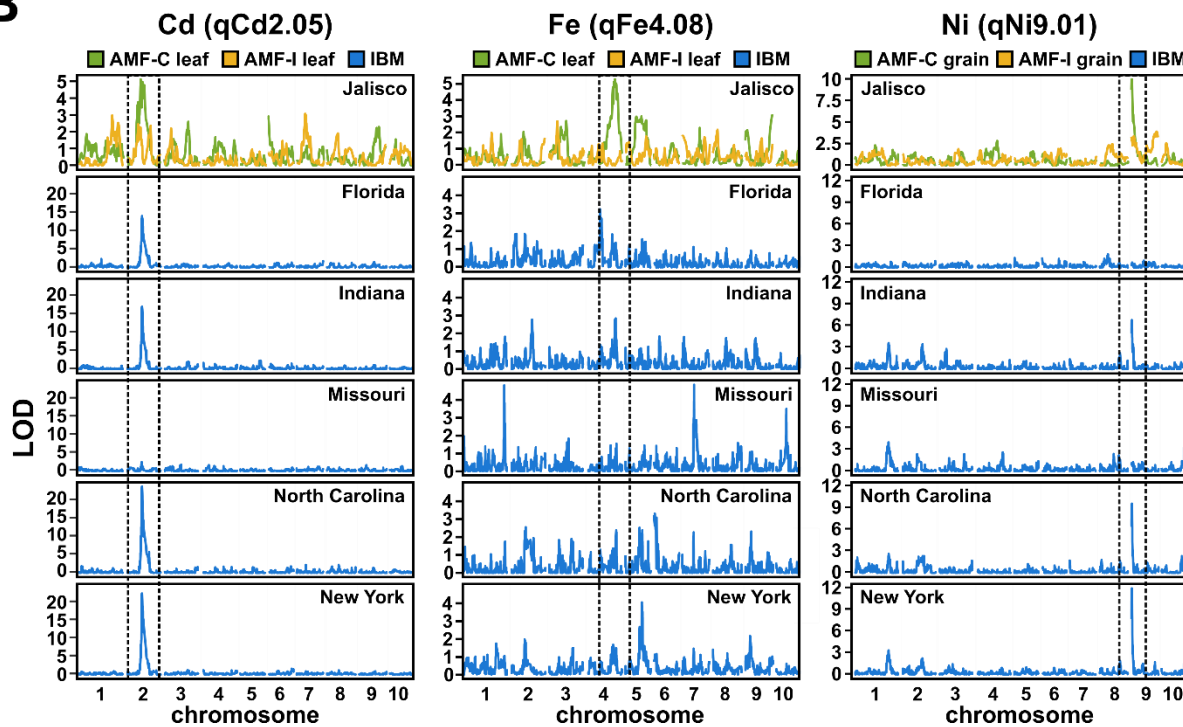

918

919

920 **Figure 3. QTL specific to AMF-C families co-localize with element QTL showing  $G \times E$**

921 **in a previously reported multisite evaluation.** A) Overlap between element QTL identified

922 in the current AMF experiment and evaluation of the Intermated B73·Mo17 (IBM) mapping

923 population across multiple sites and years (Asaro *et al.*, 2016). Coloured boxes indicate a

924 QTL was detected in AMF-C families (green), AMF-I families (yellow) or IBM (blue). B)

925 Genome wide QTL support (LOD) associated with concentrations of the named elements in

926 the AMF and IBM data. IBM plots were averaged over years when multiple data were

927 available. Dashed vertical lines highlight regions containing the named QTL identified in the

928 AMF-C population.

929

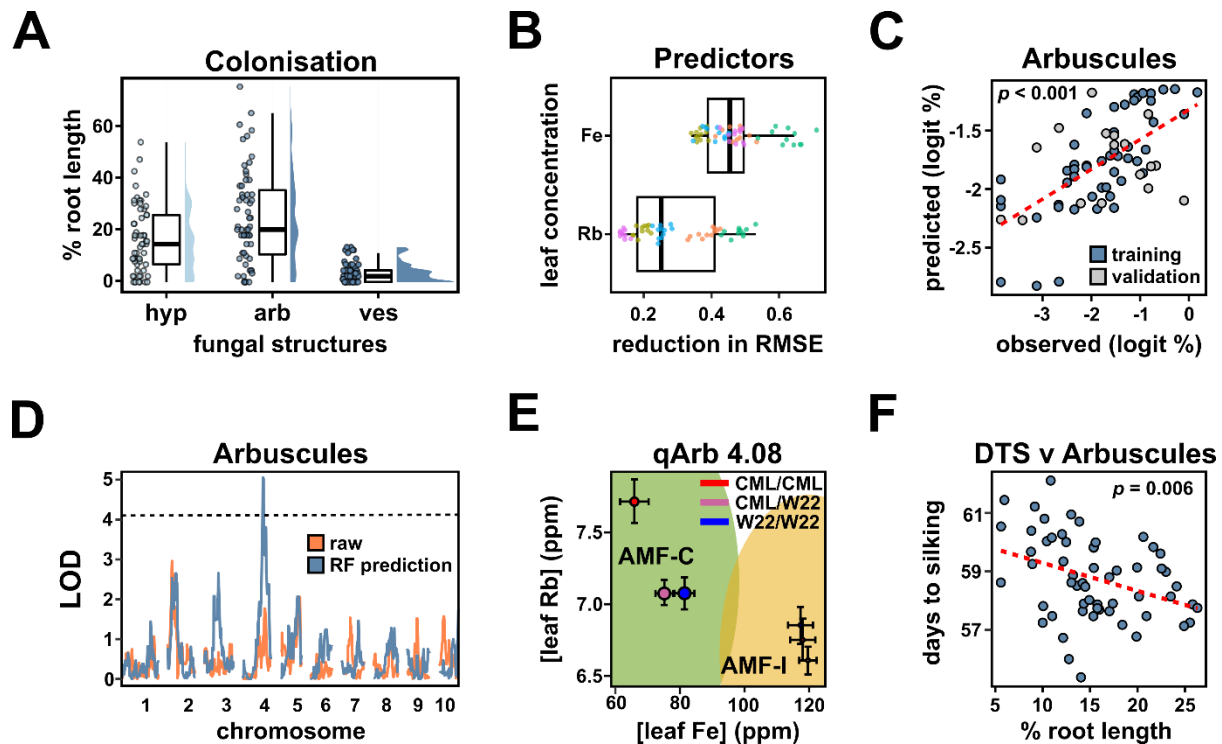

930

931

932 **Figure 4. The ionome reflects arbuscular mycorrhizal colonisation.** A) Distribution of

933 fungal colonisation across the AMF-C families as percentage root length containing fungal

934 hyphae (hyp), arbuscules (arb) or vesicles (ves). B) Agnostic variable importance for leaf Fe

935 and Rb concentration in the Random Forest (RF) model. The greater the reduction in root

936 mean square error (RMSE) the greater the importance of the variable. C) Correlation between

937 observed and RF model predicted values of logit transformed arbuscule abundance.

938 Observations in the training subset were coloured blue, and data in the validation subset was

939 coloured grey. Validation set  $r^2 = 0.041$  ( $p = 0.42$ ); complete set  $r^2 = 0.39$  ( $p < 0.001$ ). D)

940 Genome wide QTL support (LOD) support for QTL associated with raw (orange) or

941 predicted (blue) logit transformed arbuscule abundance. The black horizontal line represents

942 the LOD significance threshold ( $\alpha = 0.1$ ) for identifying qArb\_4.08. E) Effect of the genotype

943 at qArb\_4.08 on leaf Rb and Fe concentration for AMF-C (green) and AMF-I (yellow)

944 families. Colored ellipses contain 90% of the corresponding families. Points show the

945 average concentration for each genotype, and error bars represent  $\pm 1$  standard error. The

946 diameter of the point is proportional to the predicted logit transformed arbuscule abundance.

947 F) Scatterplot of Days to Silking (DTS) and predicted logit transformed arbuscule abundance;

948 a mild negative and significant correlation was observed ( $r = -0.36$ ,  $p = 0.006$ ).

949

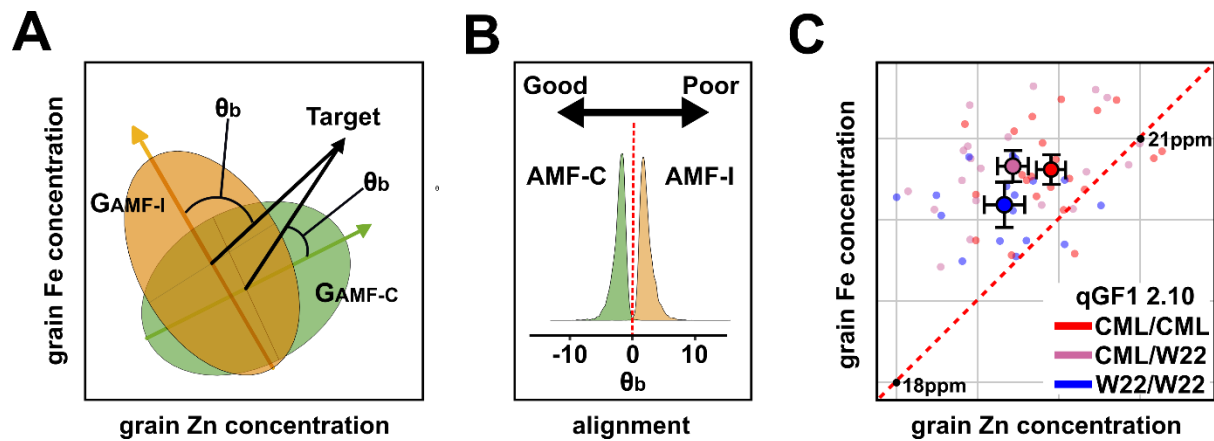

950

951

952 **Figure 5. Arbuscular mycorrhizal association may facilitate progress towards**

953 **biofortification breeding targets.** A) The alignment ( $\theta_b$ ) between the breeding target vector

954 and the major axis of genetic variation in AMF-C (green) and AMF-I families (yellow). B)

955 Distributions showing the effect sizes and corresponding sampling variance of the alignment

956 ( $\theta_b$ ) of AMF-C and AMF-I families from 5000 Monte Carlo simulations. The negative value

957 indicates that the major axis of genetic variation is well aligned with the breeding target,

958 while the positive value indicates a poor alignment. The x-axis is on a transformed scale: -8

959 indicates the alignment is approaching  $0^\circ$ , and 8 indicates the alignment is approaching  $90^\circ$ .

960 C) Effect of the genotype at qGF1\_2.1 on grain Zn and Fe concentration in AMF-C families.

961 Large points show the mean concentration  $\pm 1$  standard error. Small points show individual

962 families. The red dashed line indicates equivalence of Zn and Fe concentration.

963
